# Supplementary material for: Identifying SARS-CoV-2 antiviral compounds by screening for small molecule inhibitors of nsp12/7/8 RNA-dependent RNA polymerase
Source: PubMed Central journal article supplement (PMC8286815; doi:10.1042/bcj20210200), 2021-07-02
Supplement: BCJ-478-2425-s1.pdf [file BCJ-478-2425-s1.pdf]

## Supplementary Figure legends

**Supplementary Figure S1.** (A) Schematic diagram illustrating the FRET-based primer extension assay. The RNA substrate is composed of a Cy3 fluorophore-containing template strand and an annealed primer strand. The substrate is incubated with RdRp, which extends the primer strand generating duplex RNA. After incubation, a quencher strand is added, which can only anneal to the template strand and quench Cy3 fluorescence if RNA synthesis did *not* occur. (B) Results of the FRET-based primer-extension assay shown in (A). The quencher strand was added after 60 min of RdRp and primed-substrate incubation and fluorescence was measured after another 35 min. (C-E) Strand displacement assay using the indicated concentrations Sf nsp12-F/7H8 in the absence (C) or presence of 0.5 mM Mn<sup>2+</sup> (D) or 2 mM Mn<sup>2+</sup> (E). (F) Strand displacement assay using Sf nsp12-F/7H8 in the presence (+NTPs) or absence (no NTP) of 300 μM NTPs.

**Supplementary Figure S2.** (A) Strand displacement assay using the indicated concentrations of insect cell (Sf)-expressed nsp12-HF/7/8. This experiment was performed in parallel with the experiment shown in Figure 1E.

**Supplementary Figure S3.** (A) Strand displacement assay using 150 nM Sf nsp12-HF/7L8 premixed with Sf 7H8 (1:5 ratio) in the presence (+) or absence (-) of 5% DMSO.

**Supplementary Figure S4. High-throughput SARS-CoV-2 RdRp inhibitor screen.** (A) Representative kinetic data from control reactions in the HTS screen. For screen analysis, reaction velocities were extracted from the slope. (B) Z-score distribution for the screen performed at 3.75 μM compound concentration. (C-D) Analysis of the screen by endpoint signal. Normalised endpoint signal is plotted against compound number for the screen performed at 1.25 μM (C) or 3.75 μM (D) compound concentration.

**Supplementary Figure S5. Concentration-response curves for validation of selected compounds identified in SARS-CoV-2 RdRp screen.** (A) The experiment was performed using 150 nM RdRp, 100 nM RNA substrate, 300 μM of each NTP and in the presence (+Triton) or absence (- Triton) of 0.01% Triton X-100. Fluorescence quenching properties of the compounds were tested to identify false positives that interfered with the fluorescent substrate (quenching). (B) Quenching controls for the experiment shown in Figure 5A. IC<sub>50</sub> values were calculated using Prism software.

**Supplementary Figure S6. Comparative dose-response curves of selected antiviral compounds against SARS-CoV-2 in cell culture.** (A) Anti-SARS-CoV-2 activities of GSK-650394, C646, BH3I-1, MDK-83190 and Cefsulodin in combination with 0.5 μM remdesivir following protocol detailed in **Figure 6A**. Representative overlaid images showing N protein immunofluorescence (green) and DRAQ7 nuclei staining (red). (B) Dose-response curve analysis. Viral infection values represent the area of virus infected cells visualised by N protein staining (green curves) and, simultaneously, cell viability was measured as the area of

cells stained for DRAQ7 (red curves). Data is plotted as percentage normalised to 0.5  $\mu$ M remdesivir only treated wells (100%). Values represent mean and standard deviation (SD) of 3 replicates. Areas were calculated using FIJI software and EC<sub>50</sub> values were calculated using Prism software.

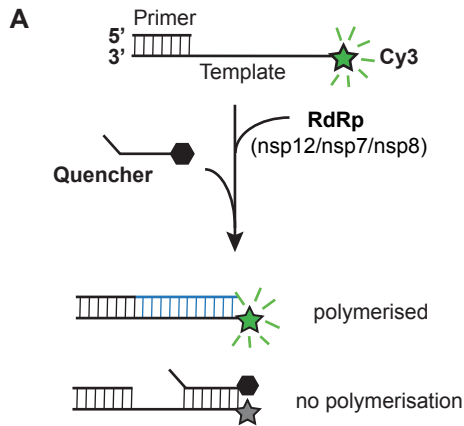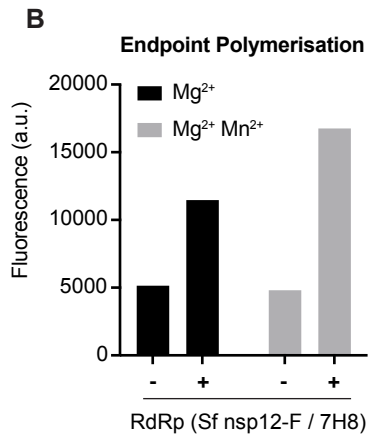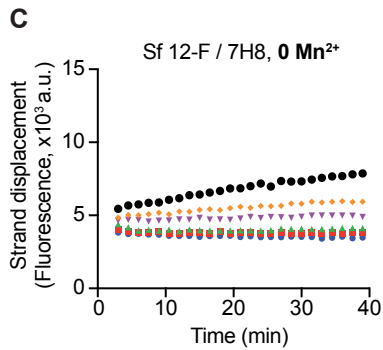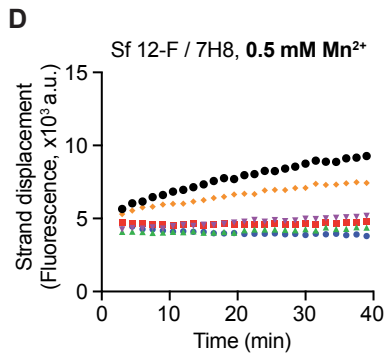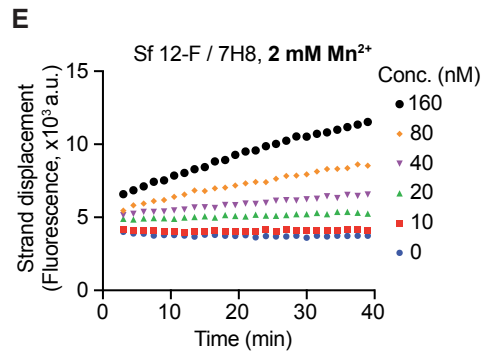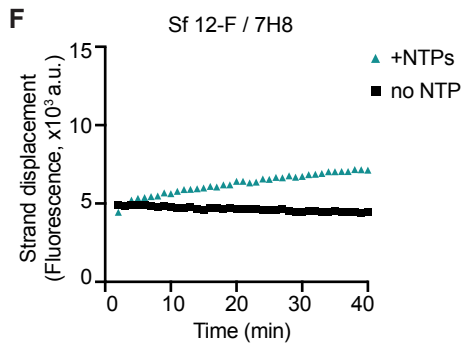

Supplementary Figure 1

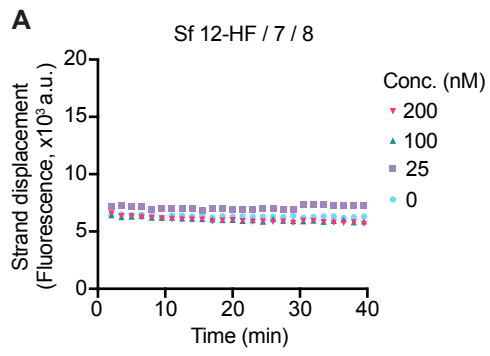

**Supplementary Figure 2**

**A**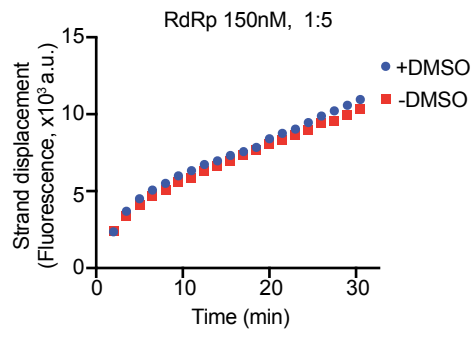**Supplementary Figure 3**

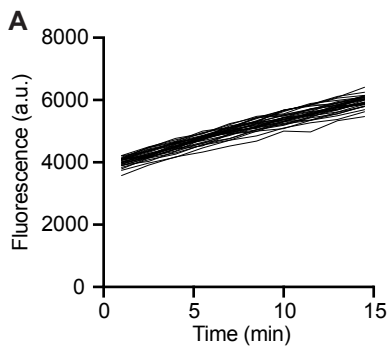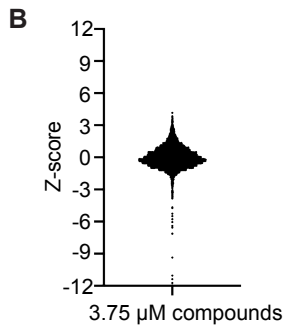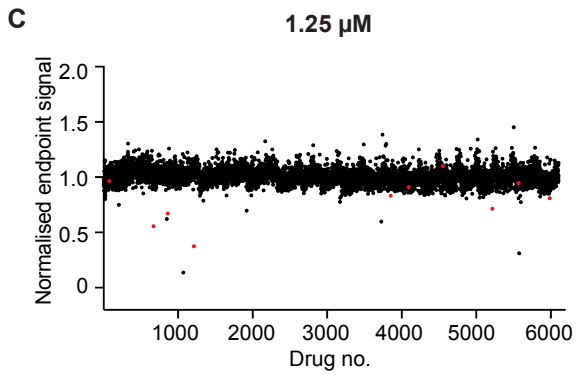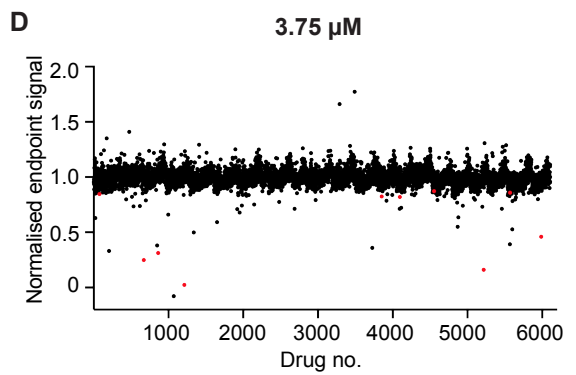

**Supplementary Figure 4**

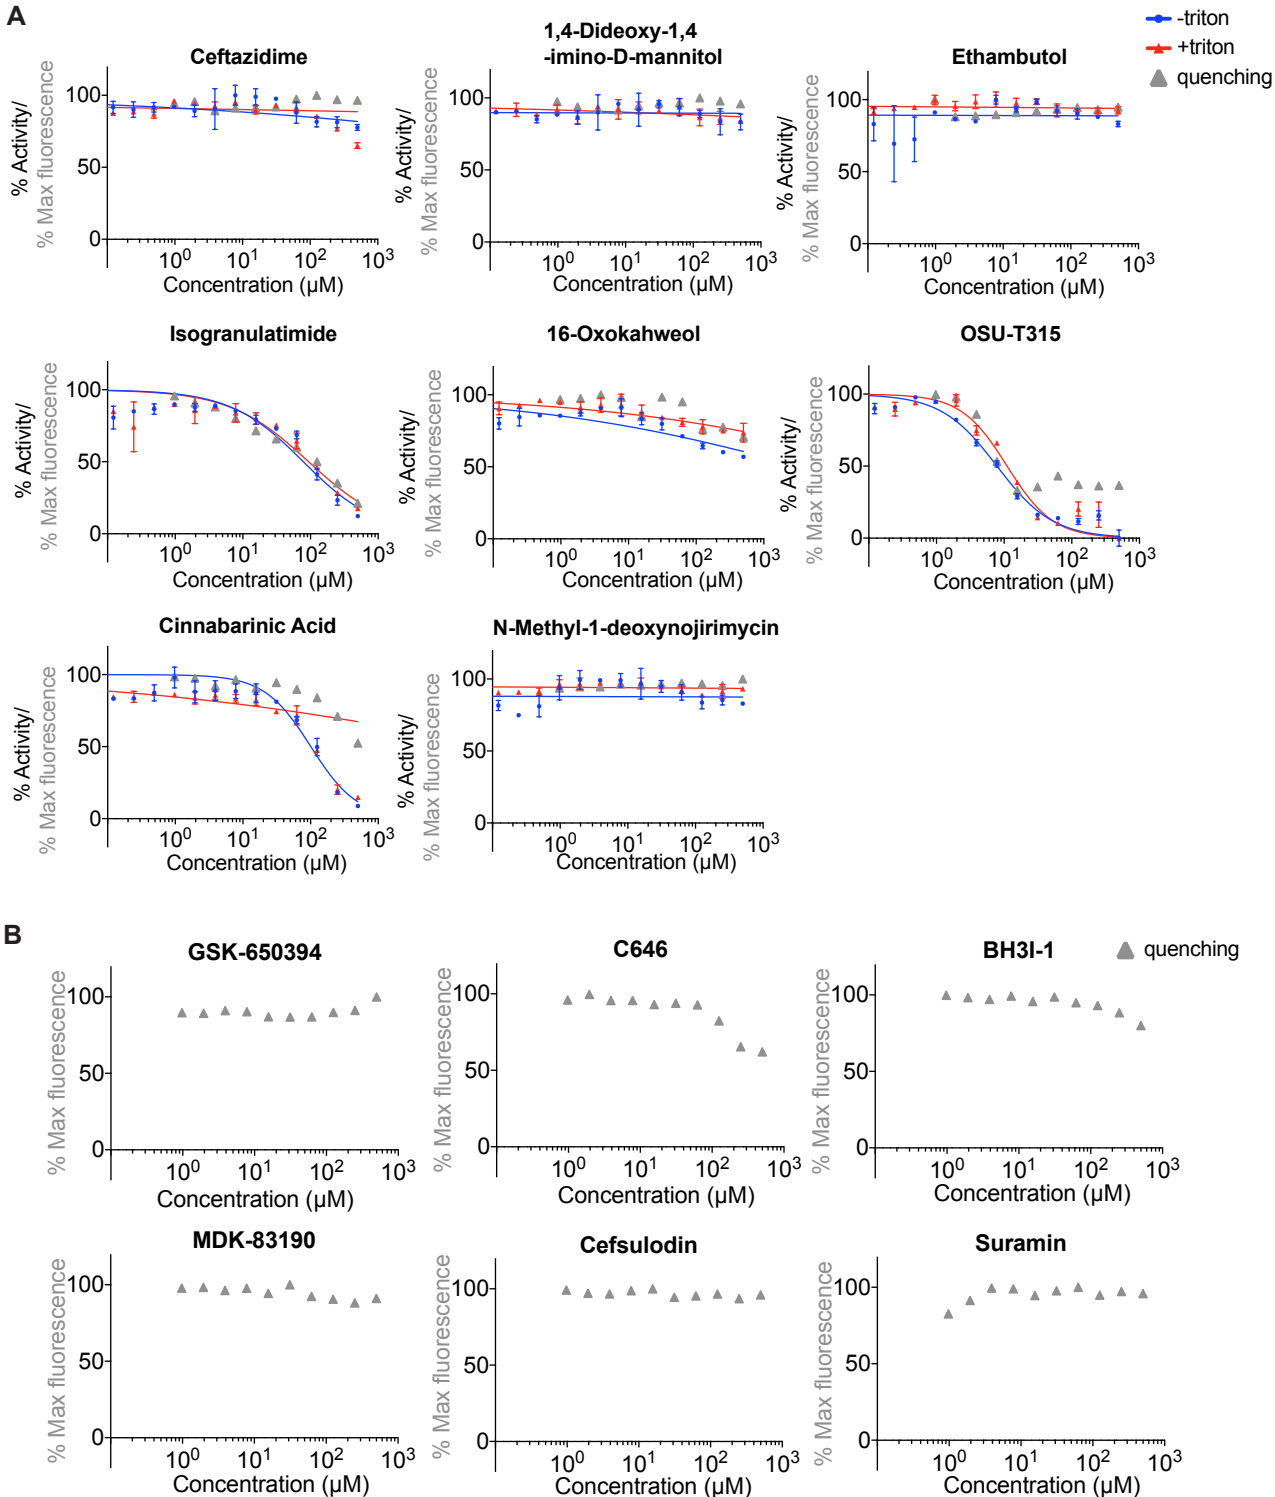

**Supplementary Figure 5**

**A**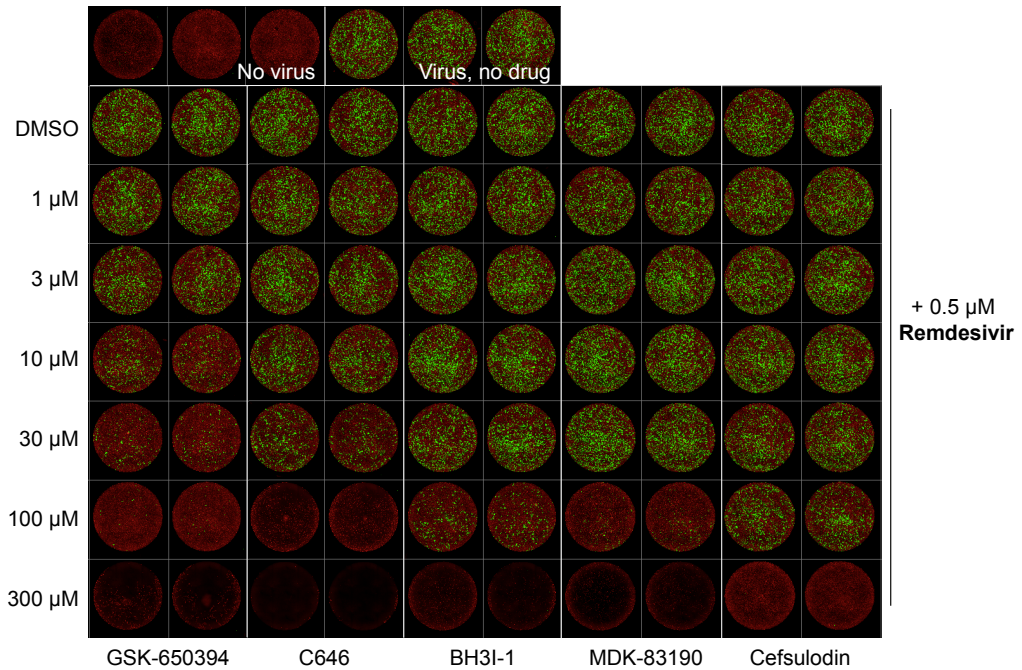**B**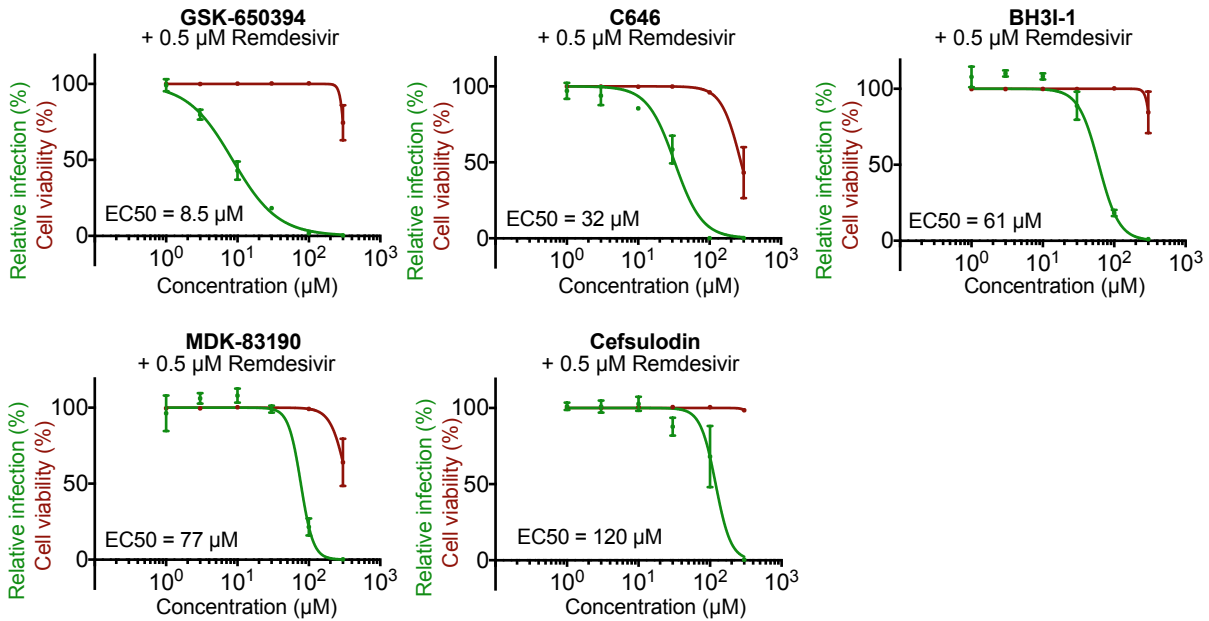**Supplementary Figure 6**



**Supplementary Table S1. Overview of purified SARS-CoV-2 RdRp proteins including yields**

| Protein preparation | Expression system       | Yield (mg) | Yield (nmol) | Construct                         | Purification                      |
|---------------------|-------------------------|------------|--------------|-----------------------------------|-----------------------------------|
| <b>7H8</b>          | Baculovirus-insect cell | 19.5*      | 607*         | nsp7-His6-nsp8                    | Ni-NTA, MonoQ, S200               |
| <b>nsp12-HF</b>     | Baculovirus-insect cell | 1.92       | 17.3         | nsp12-His6-3xFlag                 | Ni-NTA, MonoQ, S200               |
| <b>nsp12-F/7H8</b>  | Baculovirus-insect cell | 0.084      | 0.59         | nsp12-3xFlag/nsp7-His6-nsp8       | FLAG M2, Heparin, S200            |
| <b>nsp12-HF/7L8</b> | Baculovirus-insect cell | 17.0*      | 119*         | nsp12-His6-3xFlag/nsp7-GSGGS-nsp8 | Ni-NTA, MonoQ, S200               |
| <b>nsp12-HF/7/8</b> | Baculovirus-insect cell | 0.053      | 0.37         | nsp12-His6-3xFlag/nsp7/nsp8       | FLAG M2, Heparin, S200            |
| <b>nsp7</b>         | <i>E. coli</i>          | 1.96       | 213          | 14His-Sumo-nsp7                   | Ni-NTA, Ulp1, Ni-NTA, MonoQ, S200 |
| <b>nsp8</b>         | <i>E. coli</i>          | 5.34       | 244          | 14His-Sumo-nsp8                   | Ni-NTA, Ulp1, Ni-NTA, MonoQ, S200 |
| <b>nsp12</b>        | <i>E. coli</i>          | 0.65       | 6.1          | 14His-Sumo-nsp12                  | Ni-NTA, Ulp1, Ni-NTA, MonoQ, S200 |

\* Combined yield from 2 preparations.

**Supplementary Table S2. Predicted aggregation propensity of 18 HTS hit compounds**

| <b>Compound name</b>             | <b>LogP</b> | <b>Structural Similarity Index</b> |
|----------------------------------|-------------|------------------------------------|
| NF 023                           | -6.1        | -                                  |
| Suramin                          | -5.7        | -                                  |
| Cefsulodin                       | -5.7        | -                                  |
| Ceftazidime                      | -5          | -                                  |
| PPNDS                            | -3.3        | -                                  |
| Evans Blue                       | -2.7        | -                                  |
| Diphenyl Blue                    | -2.7        | -                                  |
| 1,4-Dideoxy-1,4-imino-D-mannitol | -2.6        | -                                  |
| N-Methyl-1-deoxynojirimycin      | -2.2        | -                                  |
| Ethambutol                       | 0.4         | -                                  |
| Cinnabarinic Acid                | 1.1         | -                                  |
| Isogranulatimide                 | 2           | -                                  |
| BH3I-1                           | 3.1         | -                                  |
| 16-Oxokahweol                    | 3.3         | -                                  |
| MDK 83190                        | 3.8         | -                                  |
| C646                             | 4.7         | -                                  |
| OSU-T315                         | 5.2         | -                                  |
| GSK-650394                       | 5.8         | -                                  |

Compounds analysed using the open access tool Aggregator Advisor  
See (Irwin et al., 2015)

**Supplementary Table S3. Compounds that showed only weak or no clear activity against SARS-CoV-2 RdRp *in vitro* or interfered with the fluorescent substrate by quenching**

| Compound name                           | IC <sub>50</sub> (μM) |                      | Data figure |
|-----------------------------------------|-----------------------|----------------------|-------------|
|                                         | No detergent          | + 0.01% Triton X-100 |             |
| <b>Cinnabarinic acid</b>                | >100                  | >100                 | S4A         |
| <b>Ceftazidim</b>                       | no clear inhibition   | no clear inhibition  | S4A         |
| <b>1,4-Dideoxy-1,4-imino-D-mannitol</b> | no clear inhibition   | no clear inhibition  | S4A         |
| <b>Ethambutol</b>                       | no clear inhibition   | no clear inhibition  | S4A         |
| <b>16-Oxokahweol</b>                    | no clear inhibition   | no clear inhibition  | S4A         |
| <b>N-Methyl-1-deoxynojirimycin</b>      | no clear inhibition   | no clear inhibition  | S4A         |
| <b>OSU-T315</b>                         | <sup>a</sup>          | <sup>a</sup>         | S4A         |
| <b>Isogranulatimide</b>                 | <sup>a</sup>          | <sup>a</sup>         | S4A         |

<sup>a</sup> IC<sub>50</sub> could not be assessed due to compound-related quenching effects on fluorescent substrate

**Supplementary Table S4. Purchased drugs for *in vitro* validation and viral inhibition experiments**

| <b>Compound name</b>             | <b>CAS Number</b> | <b>Company</b>       | <b>Catalog Number</b> |
|----------------------------------|-------------------|----------------------|-----------------------|
| Suramin                          | 129-46-4          | Sigma                | S2671                 |
| Cefsulodin                       | 52152-93-9        | Sigma                | C 8145                |
| Cinnabarinic Acid                | 606-59-7          | Sigma                | SML0096               |
| 1,4-Dideoxy-1,4-imino-D-mannitol | 114976-76-0       | Sigma                | D 8390                |
| C646                             | 328968-36-1       | Sigma                | SML0002               |
| OSU-T315                         | 2070015-22-2      | MedChem Express      | HY-18676              |
| MDK 83190                        | 79183-19-0        | MedChem Express      | HY-18633              |
| Ceftazidime                      | 72558-82-8        | MedChem Express      | HY-B0593              |
| BH3I-1                           | 300817-68-9       | MedChem Express      | HY-100383             |
| Remdesivir                       | 1809249-37-3      | MedChem Express      | HY-104077             |
| Isogranulatimide                 | 244148-46-7       | Calbiochem/Millipore | 371957                |
| 16-Oxokahweol                    | 108664-99-9       | Cayman Chemicals     | CAY30117              |
| N-Methyl-1-deoxynojirimycin      | 69567-10-8        | Biovitica            | BVT-0130-M001         |
| Ethambutol                       | 1070-11-7         | Selleck Chemicals    | S4004                 |
| GSK-650394                       | 890842-28-1       | Tocris               | 3572                  |
